# Supplementary material
Source: Springer Nature journal article supplement (https://www.springermedizin.de/resource/supplementary/12885_2010_2308_MOESM4_ESM.pdf/9460986)

# Rate of Change of Biomass

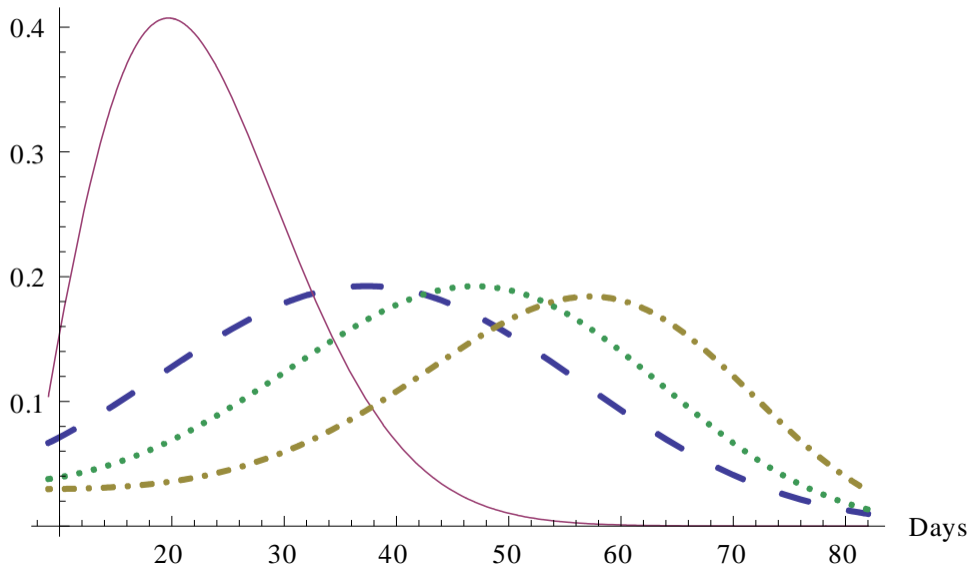

Supplement: MOESM4 [file 9460986]
